# Supplementary material
Source: PubMed Central journal article supplement (PMC5214524)
Supplement: NIHMS831540-supplement-01.pdf [file NIHMS831540-supplement-01.pdf]

615 **Supplemental figure 1. Substrate hydrolysis progress curves.** Line graphs "a to d" = negative  
616 control (HSGAG + rAAS19 + substrate without protease), positive control (protease + HSGAG  
617 + substrate without rAAS19), control (protease + rAAS19 + substrate without HSGAGs), and  
618 treatments (protease + rAAS19 + substrate with HSGAGs). Data points represent means ( $\pm$ SEM)  
619 of three separate runs. Progress curves for factor XIa are not shown.

620

621

622
